# Supplementary material for: Rapid nitrogen loss from ectomycorrhizal pine germinants signaled by their fungal symbiont
Source: Springer Nature journal article supplement (doi:10.1007/s00572-020-00959-7), 2020-05-03
Supplement: MOESM1 [file 572_2020_959_MOESM1_ESM.pdf]

## **Online Resource 1**

Article title: Rapid nitrogen loss from ectomycorrhizal pine germinants signalled by their fungal symbiont

Journal: Mycorrhiza

Authors: Joshua M Smith, Matthew D Whiteside and Melanie D Jones

Corresponding author: Melanie D Jones

Biology Department and Okanagan Institute of Biodiversity Resilience and Ecosystem Services,  
University of British Columbia, Okanagan campus, Kelowna, British Columbia, V1V 1V7  
Canada

[melanie.jones@ubc.ca](mailto:melanie.jones@ubc.ca)

**Online Resource 1.**  $^{15}\text{N}$  concentrations in shoots of *Pinus contorta* associated with *Suillus tomentosus*.

| Treatment Number | Foliar Treatment              | Hyphal Well <sup>3</sup> | Harvest Time (d) | Hyphae  | <sup>15</sup> N Analyses Replicates (Foliar Application) |           |                         |          | <sup>15</sup> N at% ( $\pm$ SD)    |                       |                                    |                       |
|------------------|-------------------------------|--------------------------|------------------|---------|----------------------------------------------------------|-----------|-------------------------|----------|------------------------------------|-----------------------|------------------------------------|-----------------------|
|                  |                               |                          |                  |         | Shoot (H <sub>2</sub> O)                                 | Shoot (N) | Root (H <sub>2</sub> O) | Root (N) | Shoot (H <sub>2</sub> O)           | Shoot (N)             | Root (H <sub>2</sub> O)            | Root (N)              |
| 1                | Differential <sup>1</sup>     | N/A                      | 73               | Intact  | 3                                                        | 3         | 5 <sup>4</sup>          | -        | 0.36498 $\pm$ 0.00044              | 0.36467 $\pm$ 0.00044 | 0.36529 $\pm$ 0.00082 <sup>4</sup> | -                     |
| 2                | H <sub>2</sub> O <sup>2</sup> | N/A                      | 73               | Intact  | 6                                                        | -         | 4                       | -        | 0.36456 $\pm$ 0.00059              | -                     | 0.36546 $\pm$ 0.00065              | -                     |
| 3                | Differential <sup>1</sup>     | NH <sub>4</sub>          | 75               | Intact  | 8                                                        | 8         | 7                       | 7        | 0.37013 $\pm$ 0.00714              | 0.37459 $\pm$ 0.02246 | 0.40144 $\pm$ 0.03624              | 0.44986 $\pm$ 0.13613 |
| 4                | Differential <sup>1</sup>     | Glycine                  | 75               | Intact  | 8                                                        | 8         | 7                       | 6        | 0.40763 $\pm$ 0.06895              | 0.41788 $\pm$ 0.12623 | 0.77019 $\pm$ 0.53239              | 0.96079 $\pm$ 1.14465 |
| 5                | Differential <sup>1</sup>     | H <sub>2</sub> O         | 75               | Intact  | 4                                                        | 4         | 3                       | 3        | 0.36481 $\pm$ 0.00044              | 0.36478 $\pm$ 0.00092 | 0.36525 $\pm$ 0.00094              | 0.36518 $\pm$ 0.00082 |
| 6                | H <sub>2</sub> O <sup>2</sup> | NH <sub>4</sub>          | 75               | Intact  | 8                                                        | -         | 7                       | -        | 0.37173 $\pm$ 0.00967              | -                     | 0.39652 $\pm$ 0.03413              | -                     |
| 7                | H <sub>2</sub> O <sup>2</sup> | Glycine                  | 75               | Intact  | 8                                                        | -         | 6                       | -        | 0.36550 $\pm$ 0.00237              | -                     | 0.37652 $\pm$ 0.01550              | -                     |
| 8                | H <sub>2</sub> O <sup>2</sup> | H <sub>2</sub> O         | 75               | Intact  | 8                                                        | -         | 5                       | -        | 0.36485 $\pm$ 0.00069              | -                     | 0.36476 $\pm$ 0.00079              | -                     |
| 9                | Differential <sup>1</sup>     | NH <sub>4</sub>          | 75               | Severed | 4 <sup>4</sup>                                           | -         | 4 <sup>4</sup>          | -        | 0.36890 $\pm$ 0.00473 <sup>4</sup> | -                     | 0.40152 $\pm$ 0.03464 <sup>4</sup> | -                     |
| 10               | Differential <sup>1</sup>     | Glycine                  | 75               | Severed | 5 <sup>4</sup>                                           | -         | 4 <sup>4</sup>          | -        | 0.36532 $\pm$ 0.00083 <sup>4</sup> | -                     | 0.36819 $\pm$ 0.00521 <sup>4</sup> | -                     |

<sup>1</sup>Microcosms where the foliage of one of the two *P. contorta* seedlings was treated with 4.7 mM-N NH<sub>4</sub>Cl and the other received deionized H<sub>2</sub>O.

<sup>2</sup>Microcosms where the foliage of both seedlings received H<sub>2</sub>O.

<sup>3</sup>At 73 d; 9.46 mM-N NH<sub>4</sub>Cl (98+ at%  $^{15}\text{N}$ ), 9.46 mM-N glycine (99+ at%  $^{15}\text{N}$ ), or deionized H<sub>2</sub>O were added to wells accessible by hyphae but not roots; N/A indicates treatments that were harvested before N additions were made to the hyphal wells.

<sup>4</sup>Analyses where differential foliar applications were merged due to low replicate counts.
